# Supplementary material for: Drainage reduces CO 2 uptake and increases CO 2 efflux by a Siberian floodplain due to shifts in vegetation community and soil thermal characteristics
Source: Copernicus journal article supplement (doi:10.5194/bg-2015-629), 2016-01-18
Supplement: Supplementary file 1 [file bg-2015-629-supplement.pdf]

(a)

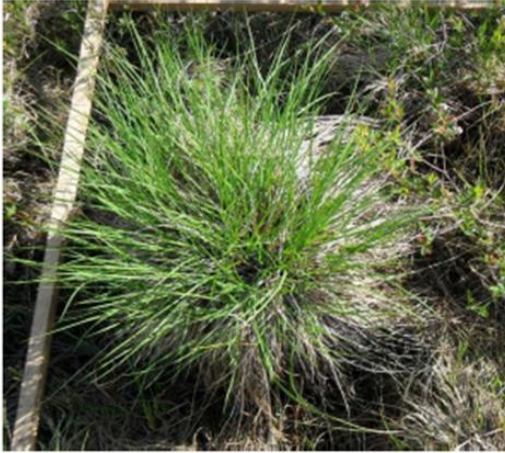

(b)

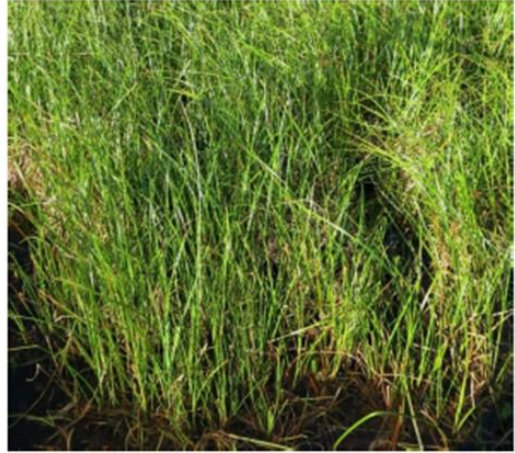

1  
2

Appendix 1 Dominant vegetation species, (a) *Carex* species, (b) *Eriophorum angustifolium*

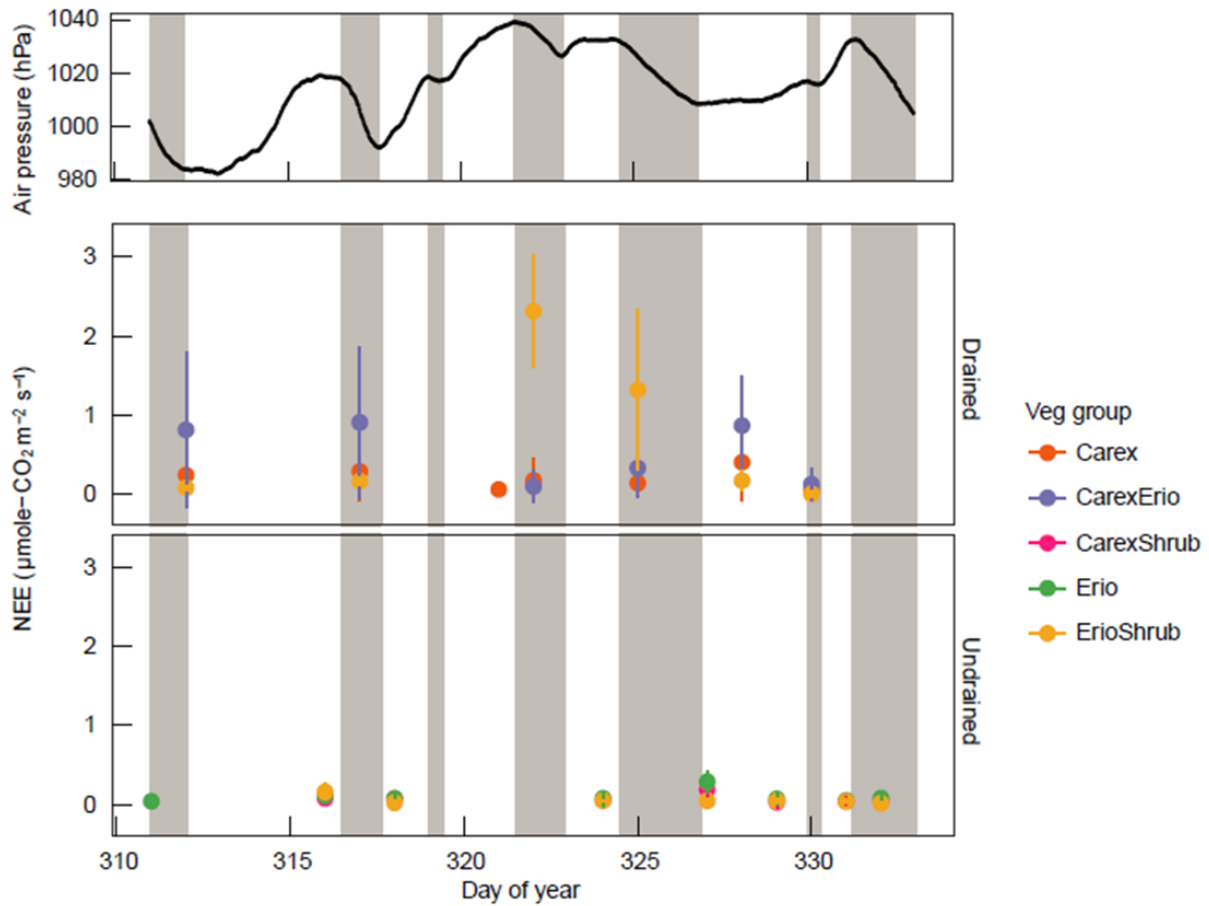

3  
 4 Appendix 2 Atmospheric pressure (top) and NEE of November 2013 by vegetation group  
 5 presented in parallel. Time period with decreasing air pressure was shaded in gray. NEE fluxes  
 6 were pooled by vegetation group (color) and mean values and standard deviation were plotted.

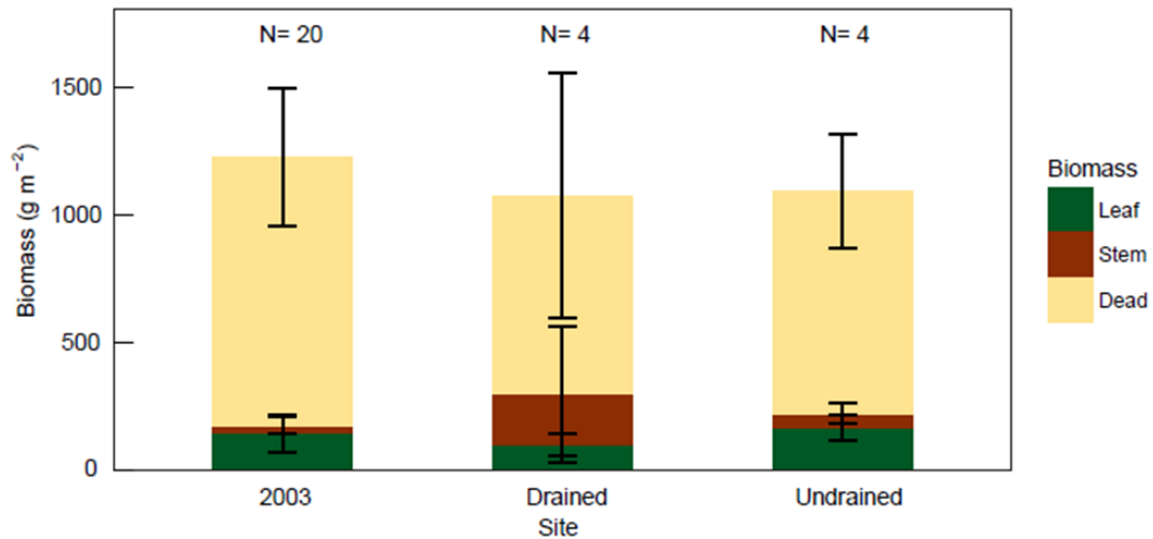

7  
8 Appendix 3 Total aboveground dry biomass of standing dead and living plants, measured in  
9 2003 (N=20) and 2013 (N=4). Weight of dry biomass was summed up regardless of species.  
10 Dead: standing dead material largely from *Carex* species and *Eriophorum angustifolium*, stem:  
11 stems mainly from shrub species, leaf: green leaves of all species. Mean and standard deviation  
12 of replicates are described with bars and error bars.
